# Supplementary material
Source: publisher figshare collection journal article supplement (https://frontiersin.figshare.com/ndownloader/files/17620031)

A

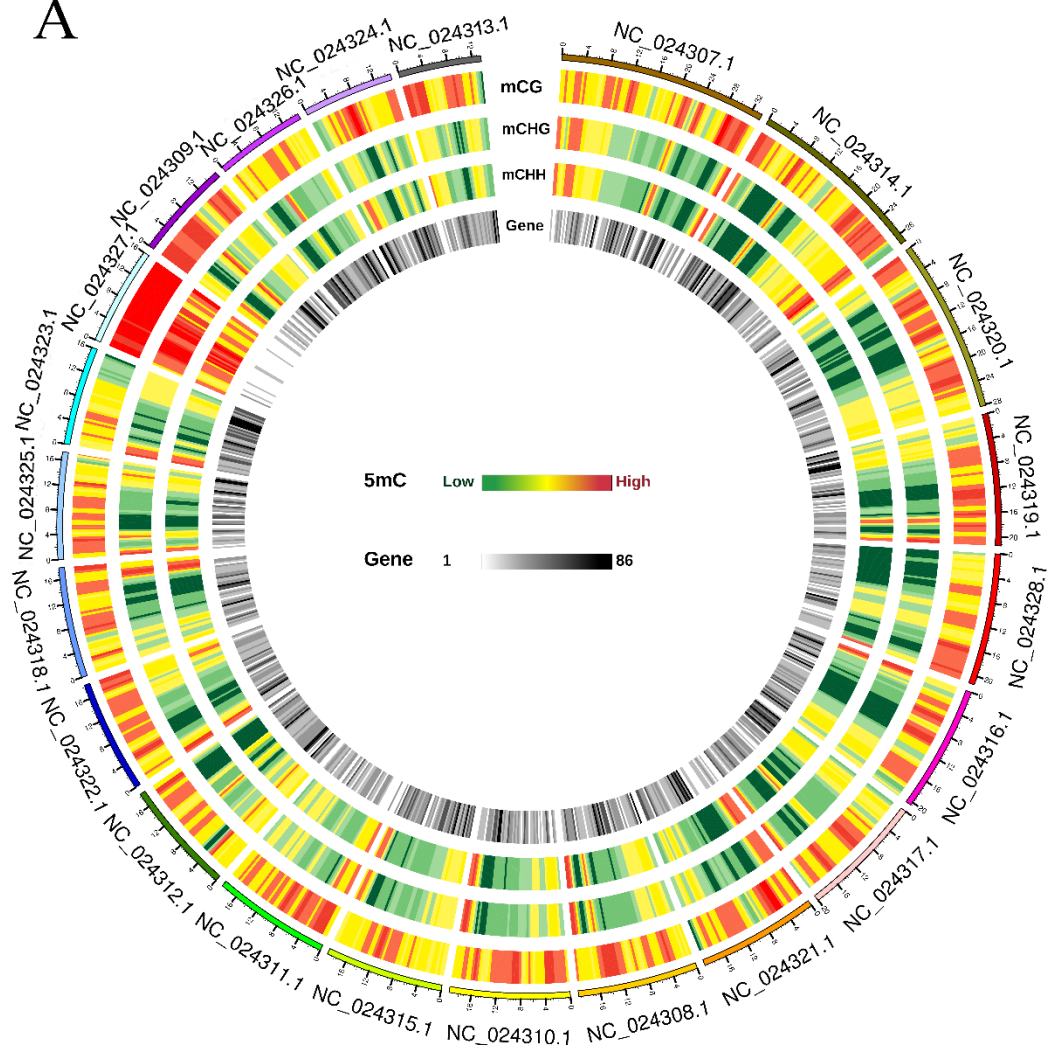

B

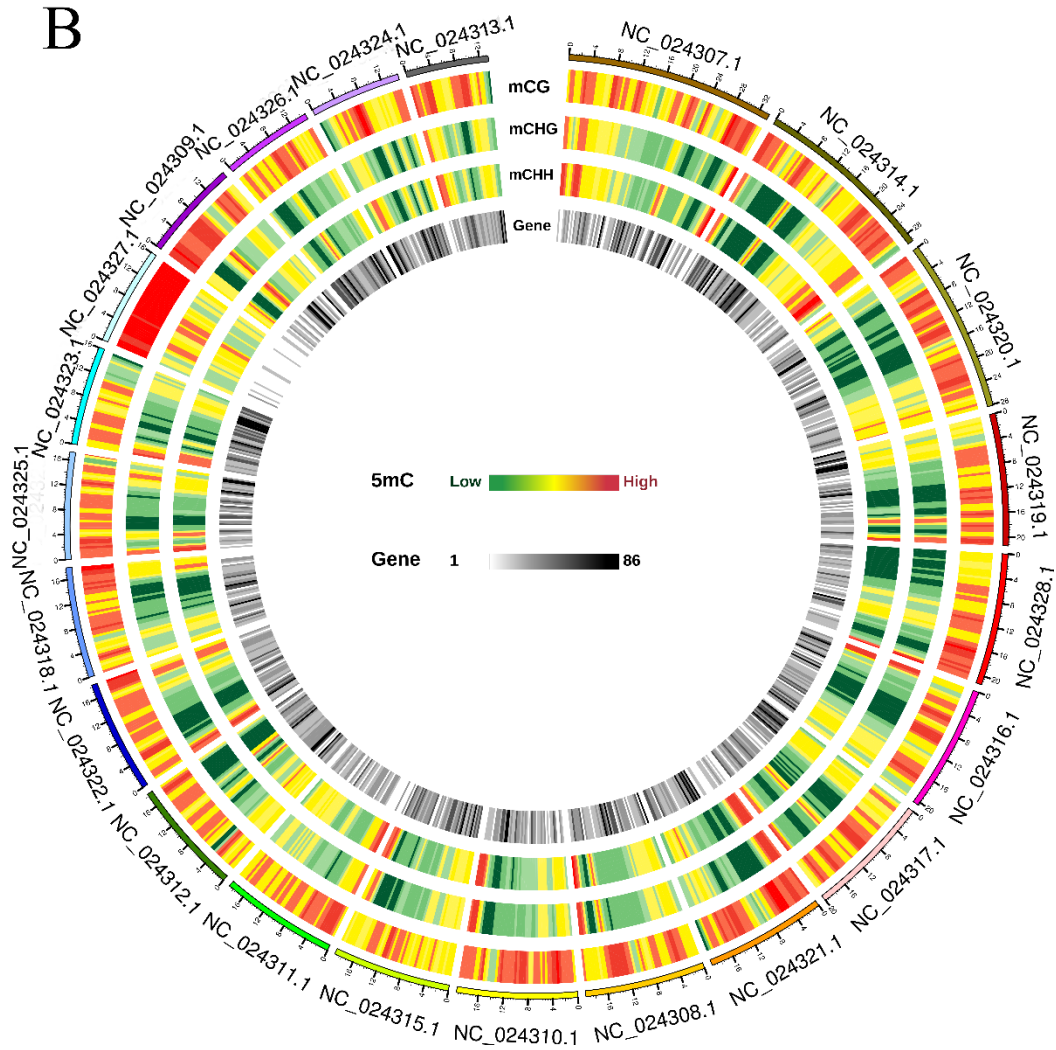

Supplement: Supplementary file 1 [file 17620031]

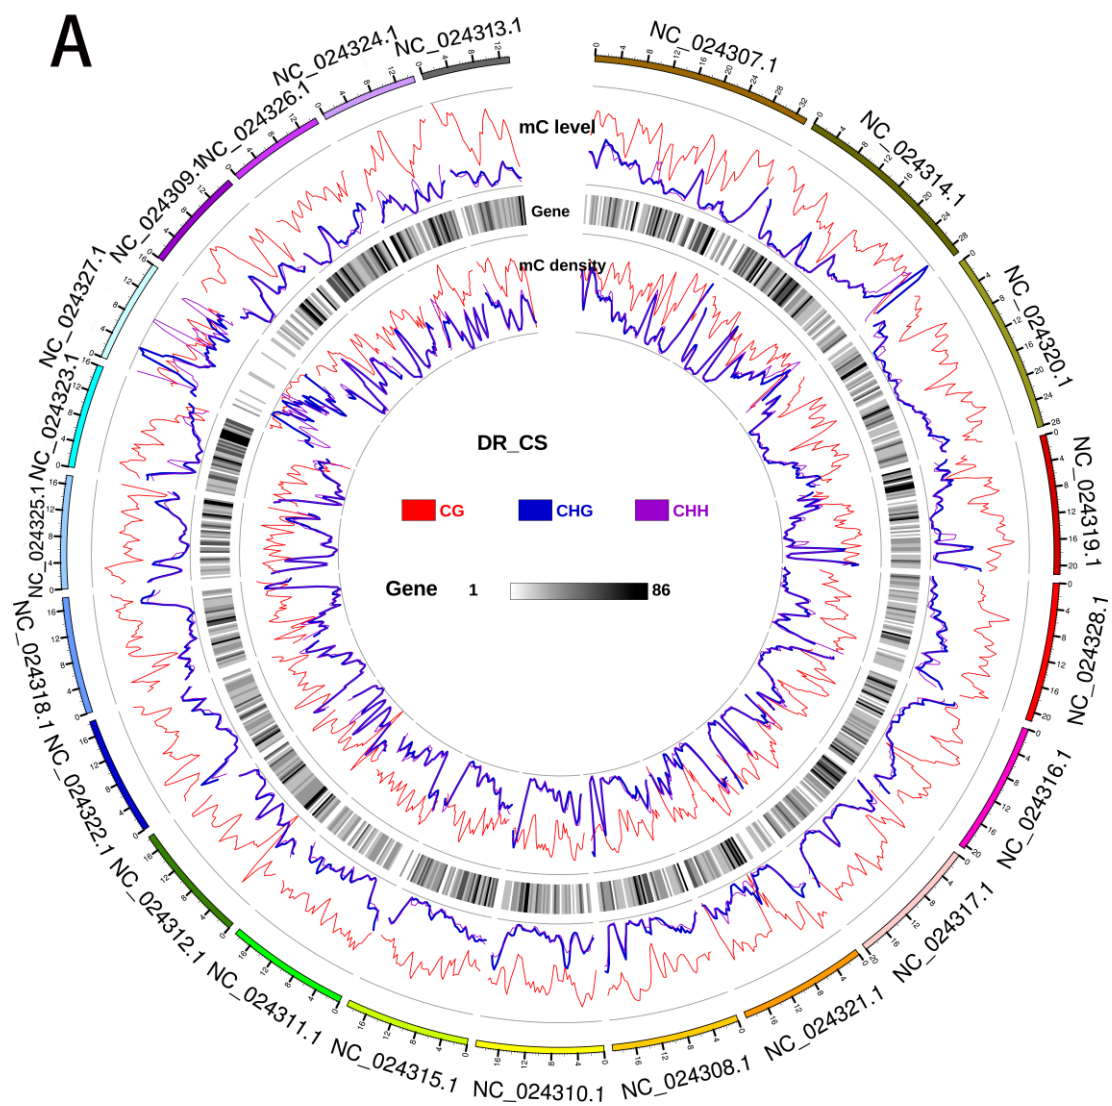

**B**

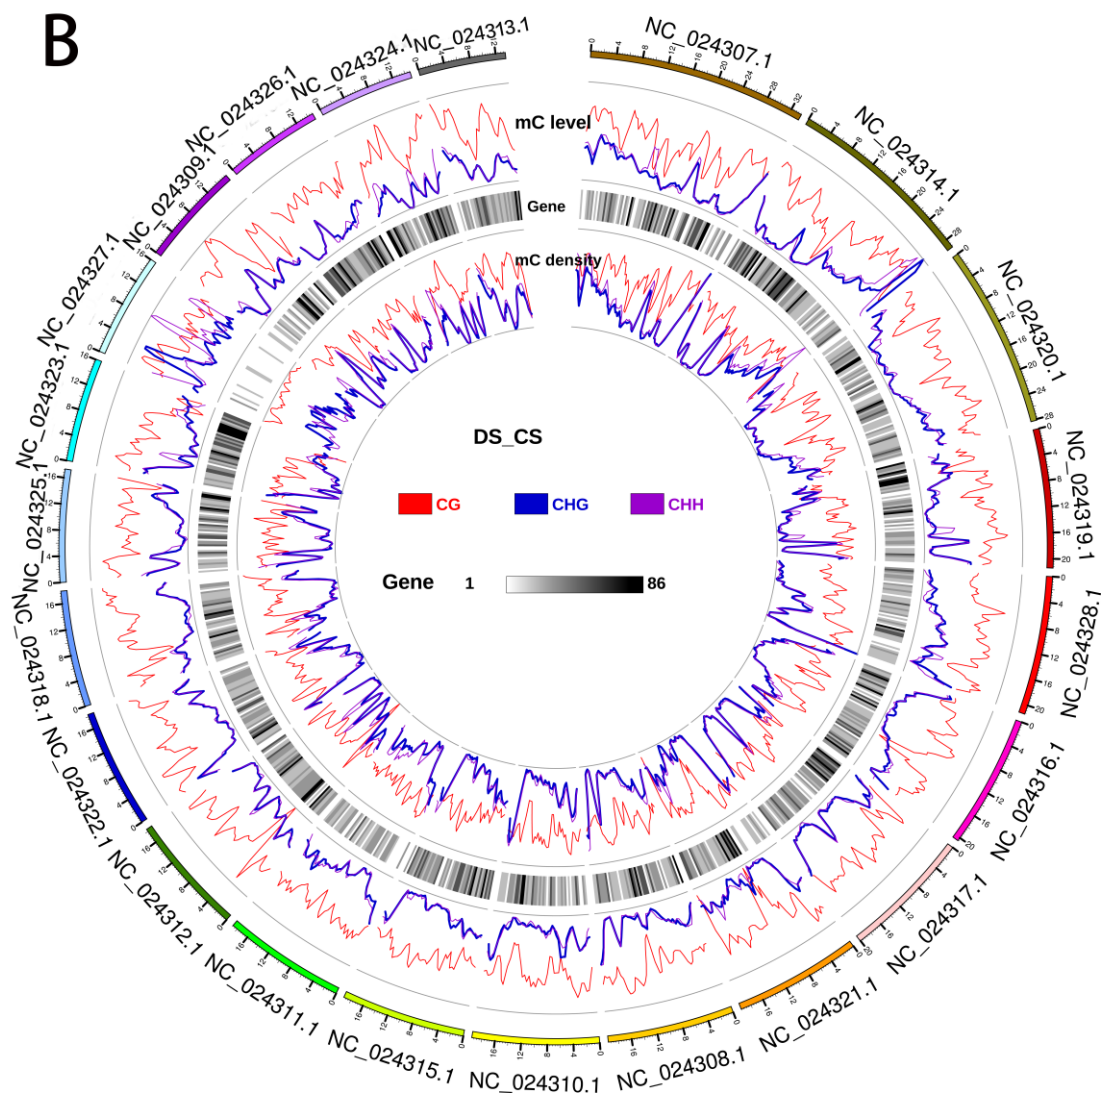

Supplement: Supplementary file 2 [file 17620031]

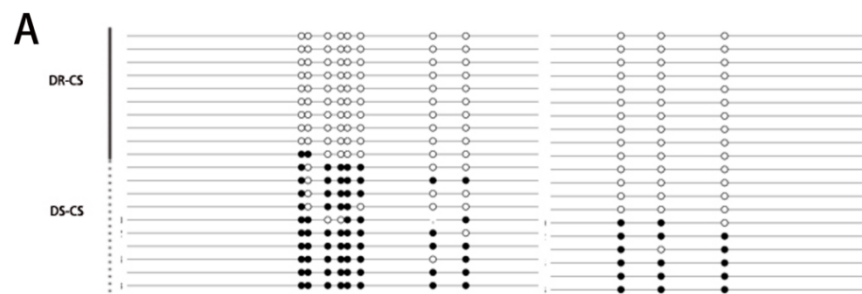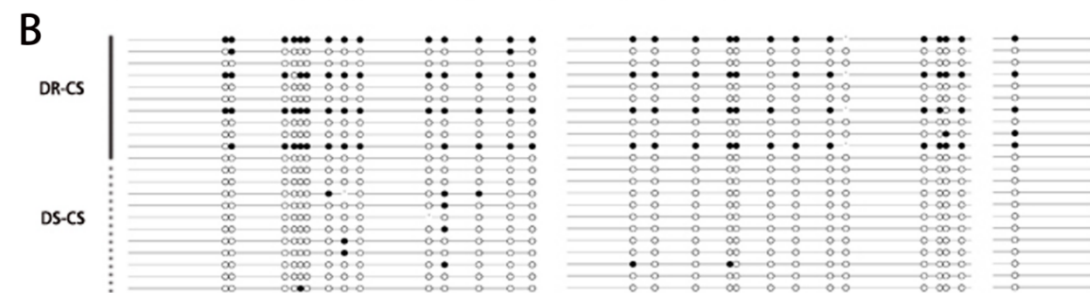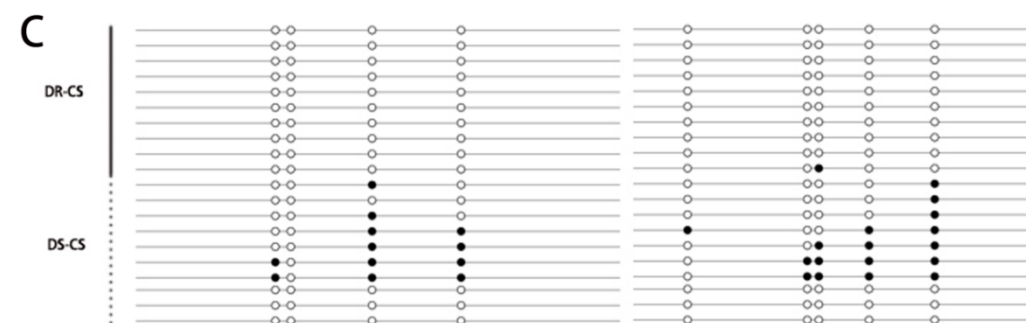

Supplement: Supplementary file 3 [file 17620031]

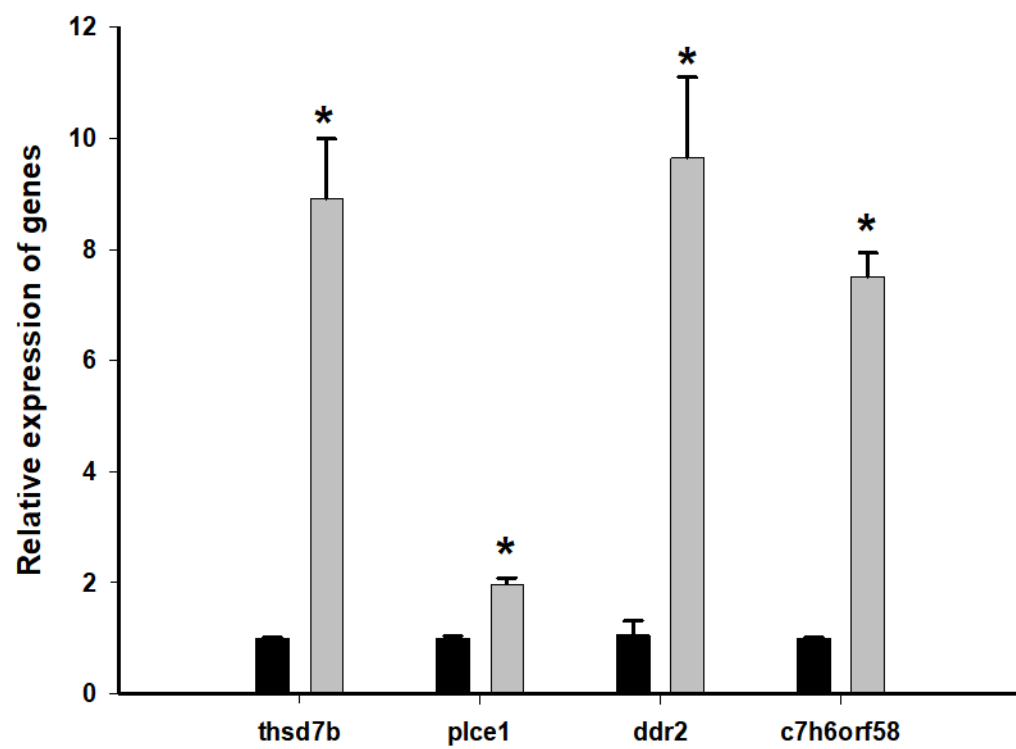

Supplement: Supplementary file 4 [file 17620031]

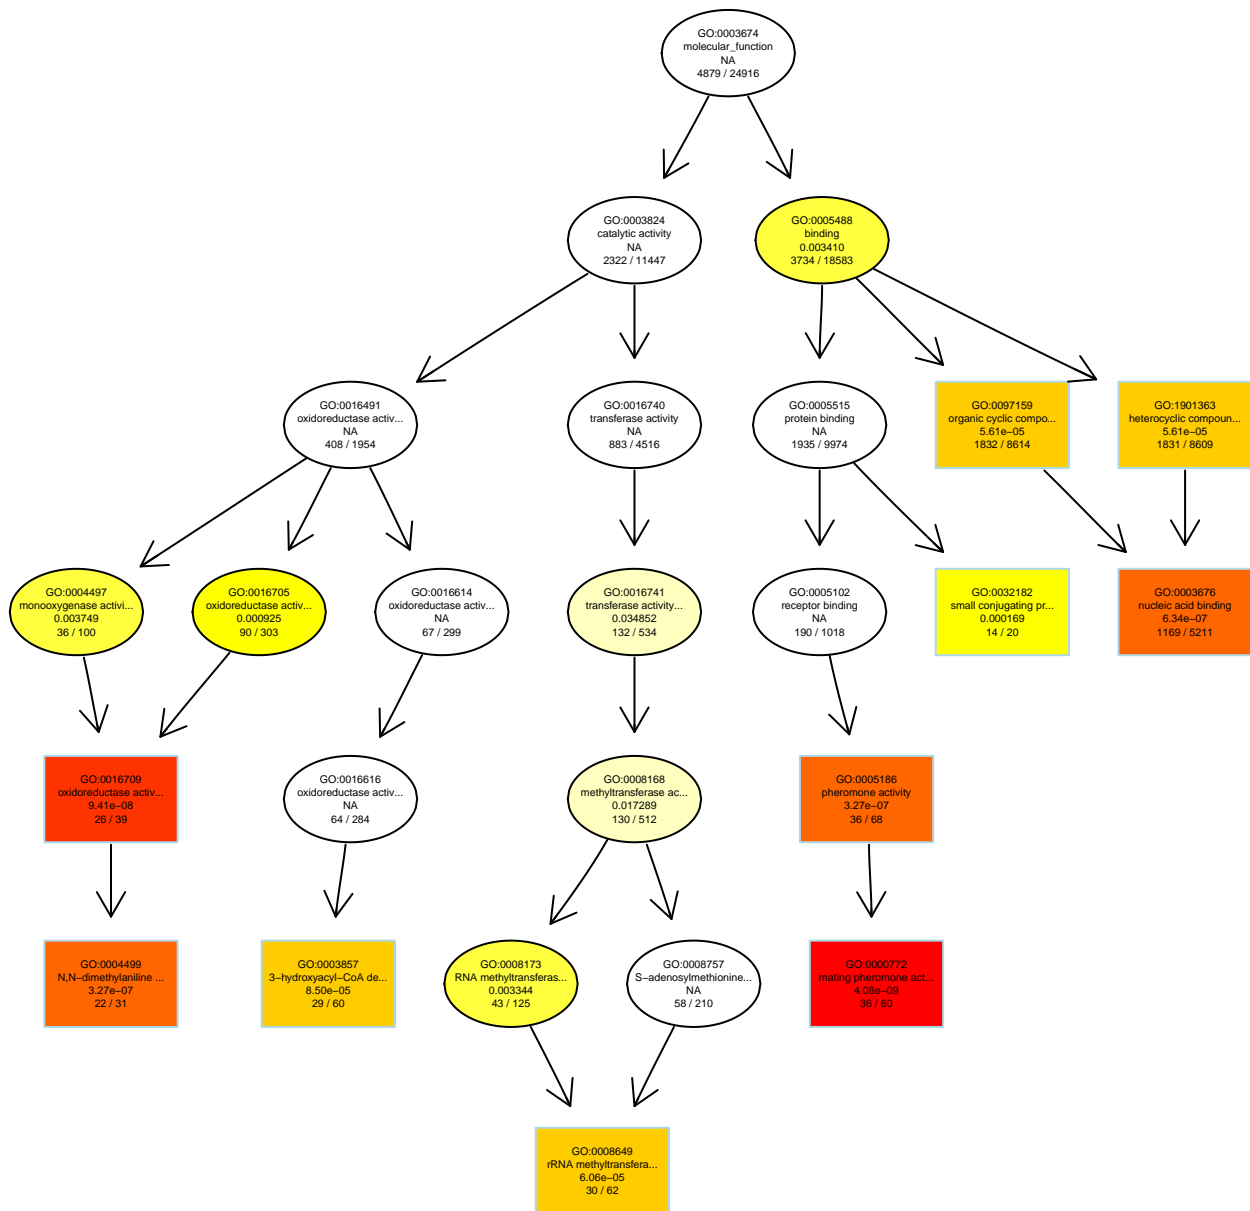

Supplement: Supplementary file 5 [file 17620031]

Enriched GO Terms  
(NA)

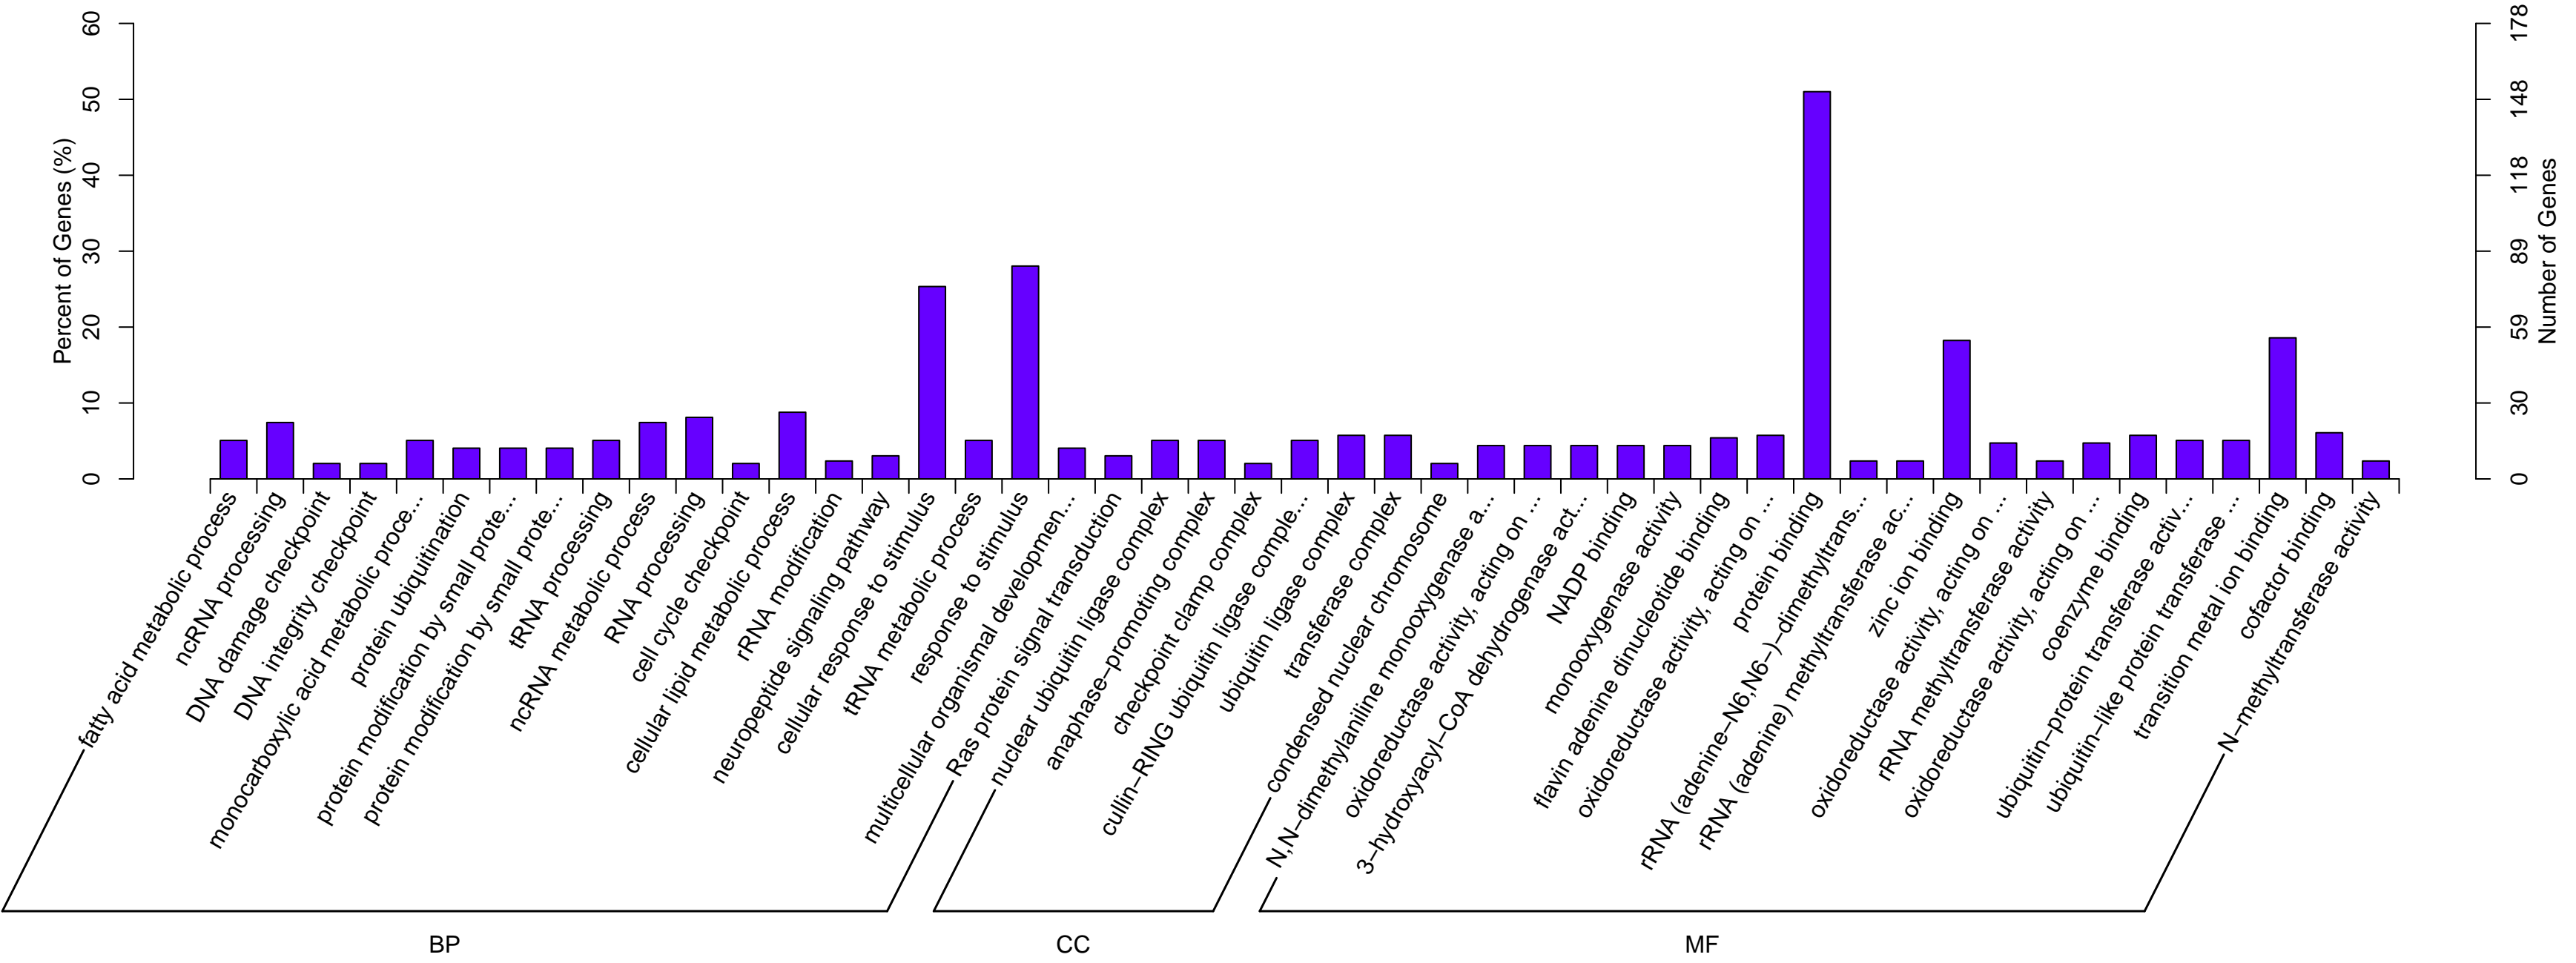

Supplement: Supplementary file 6 [file 17620031]

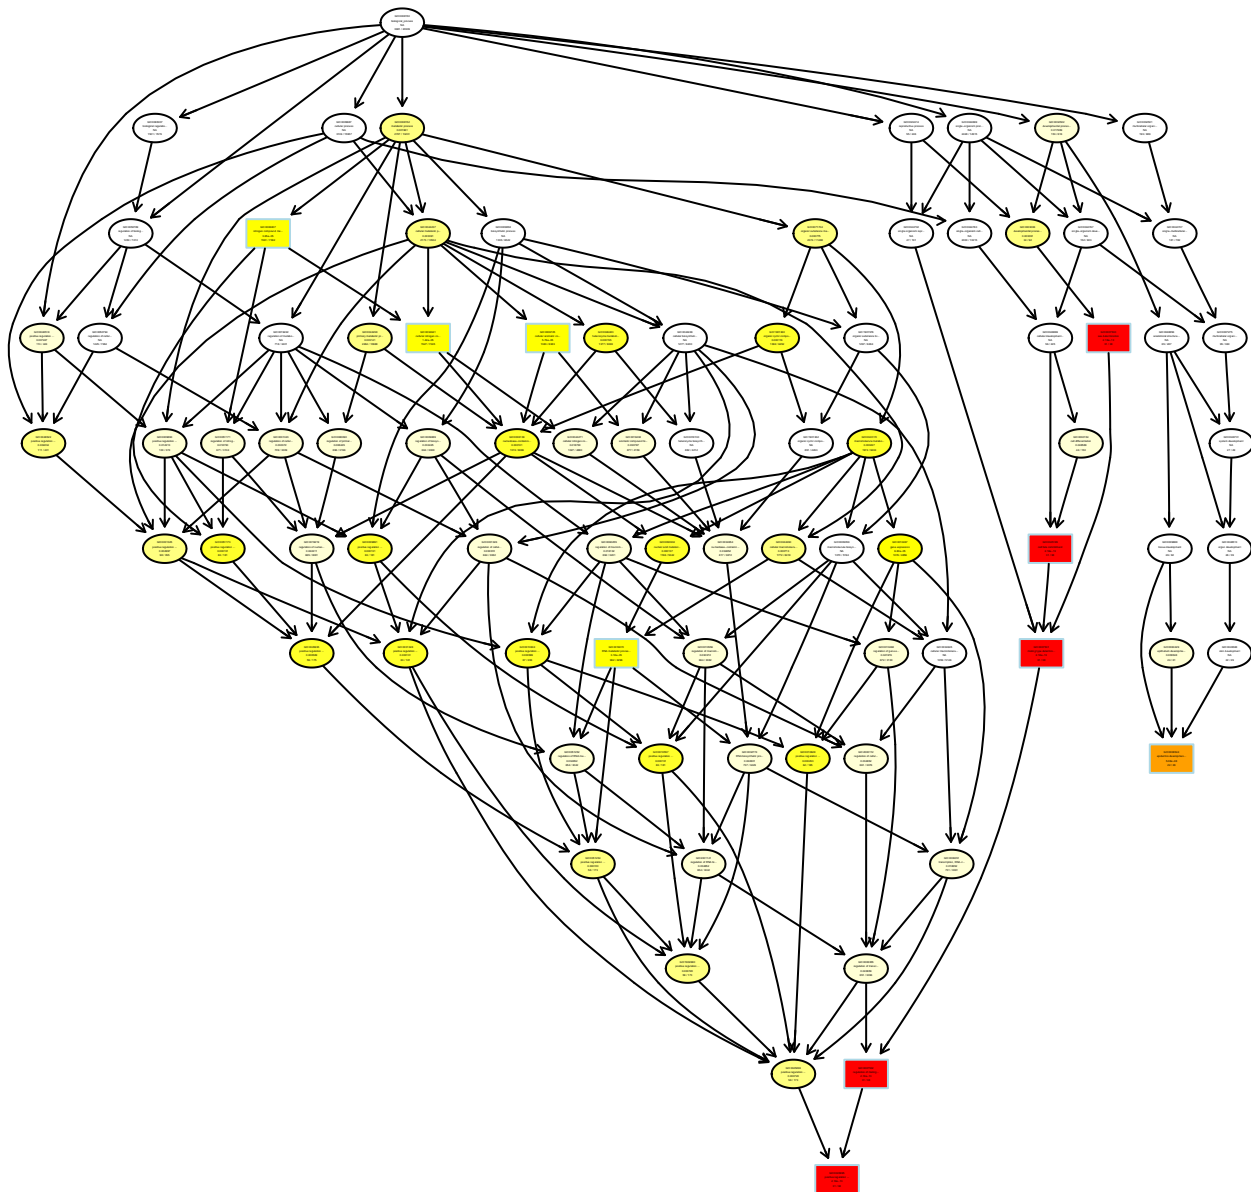

Supplement: Supplementary file 7 [file 17620031]

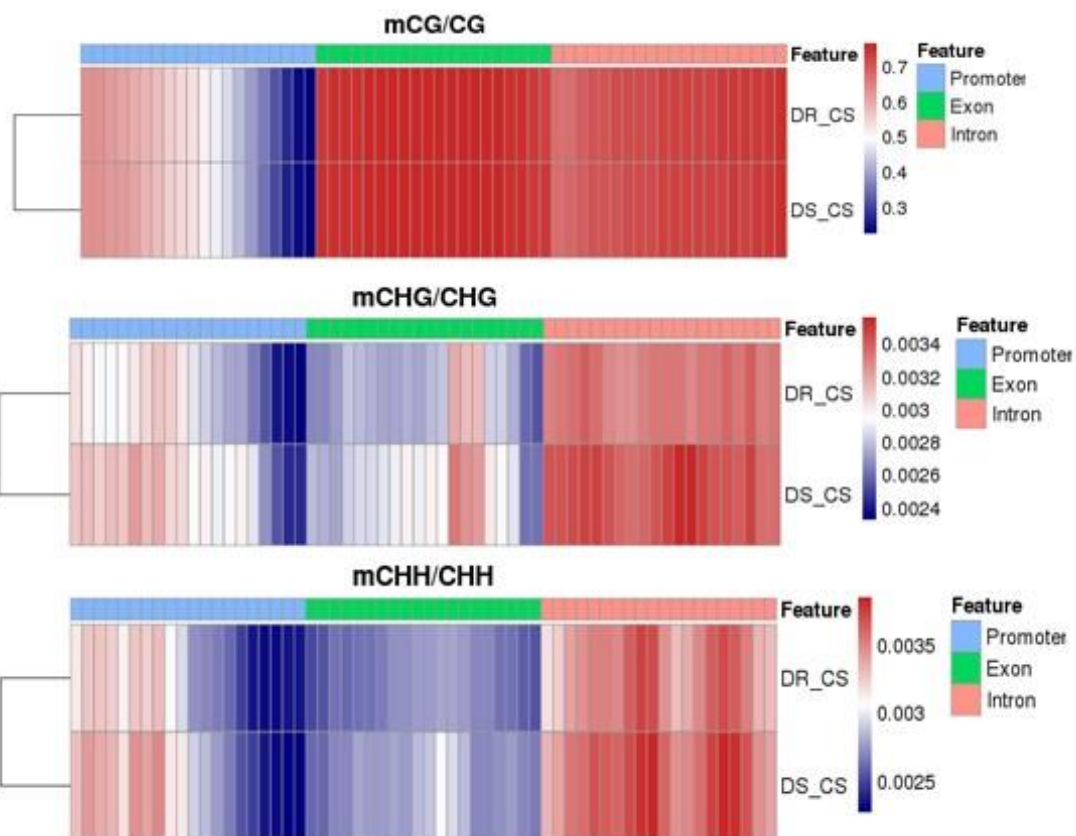

Supplement: Supplementary file 8 [file 17620031]

Enriched GO Terms  
(NA)

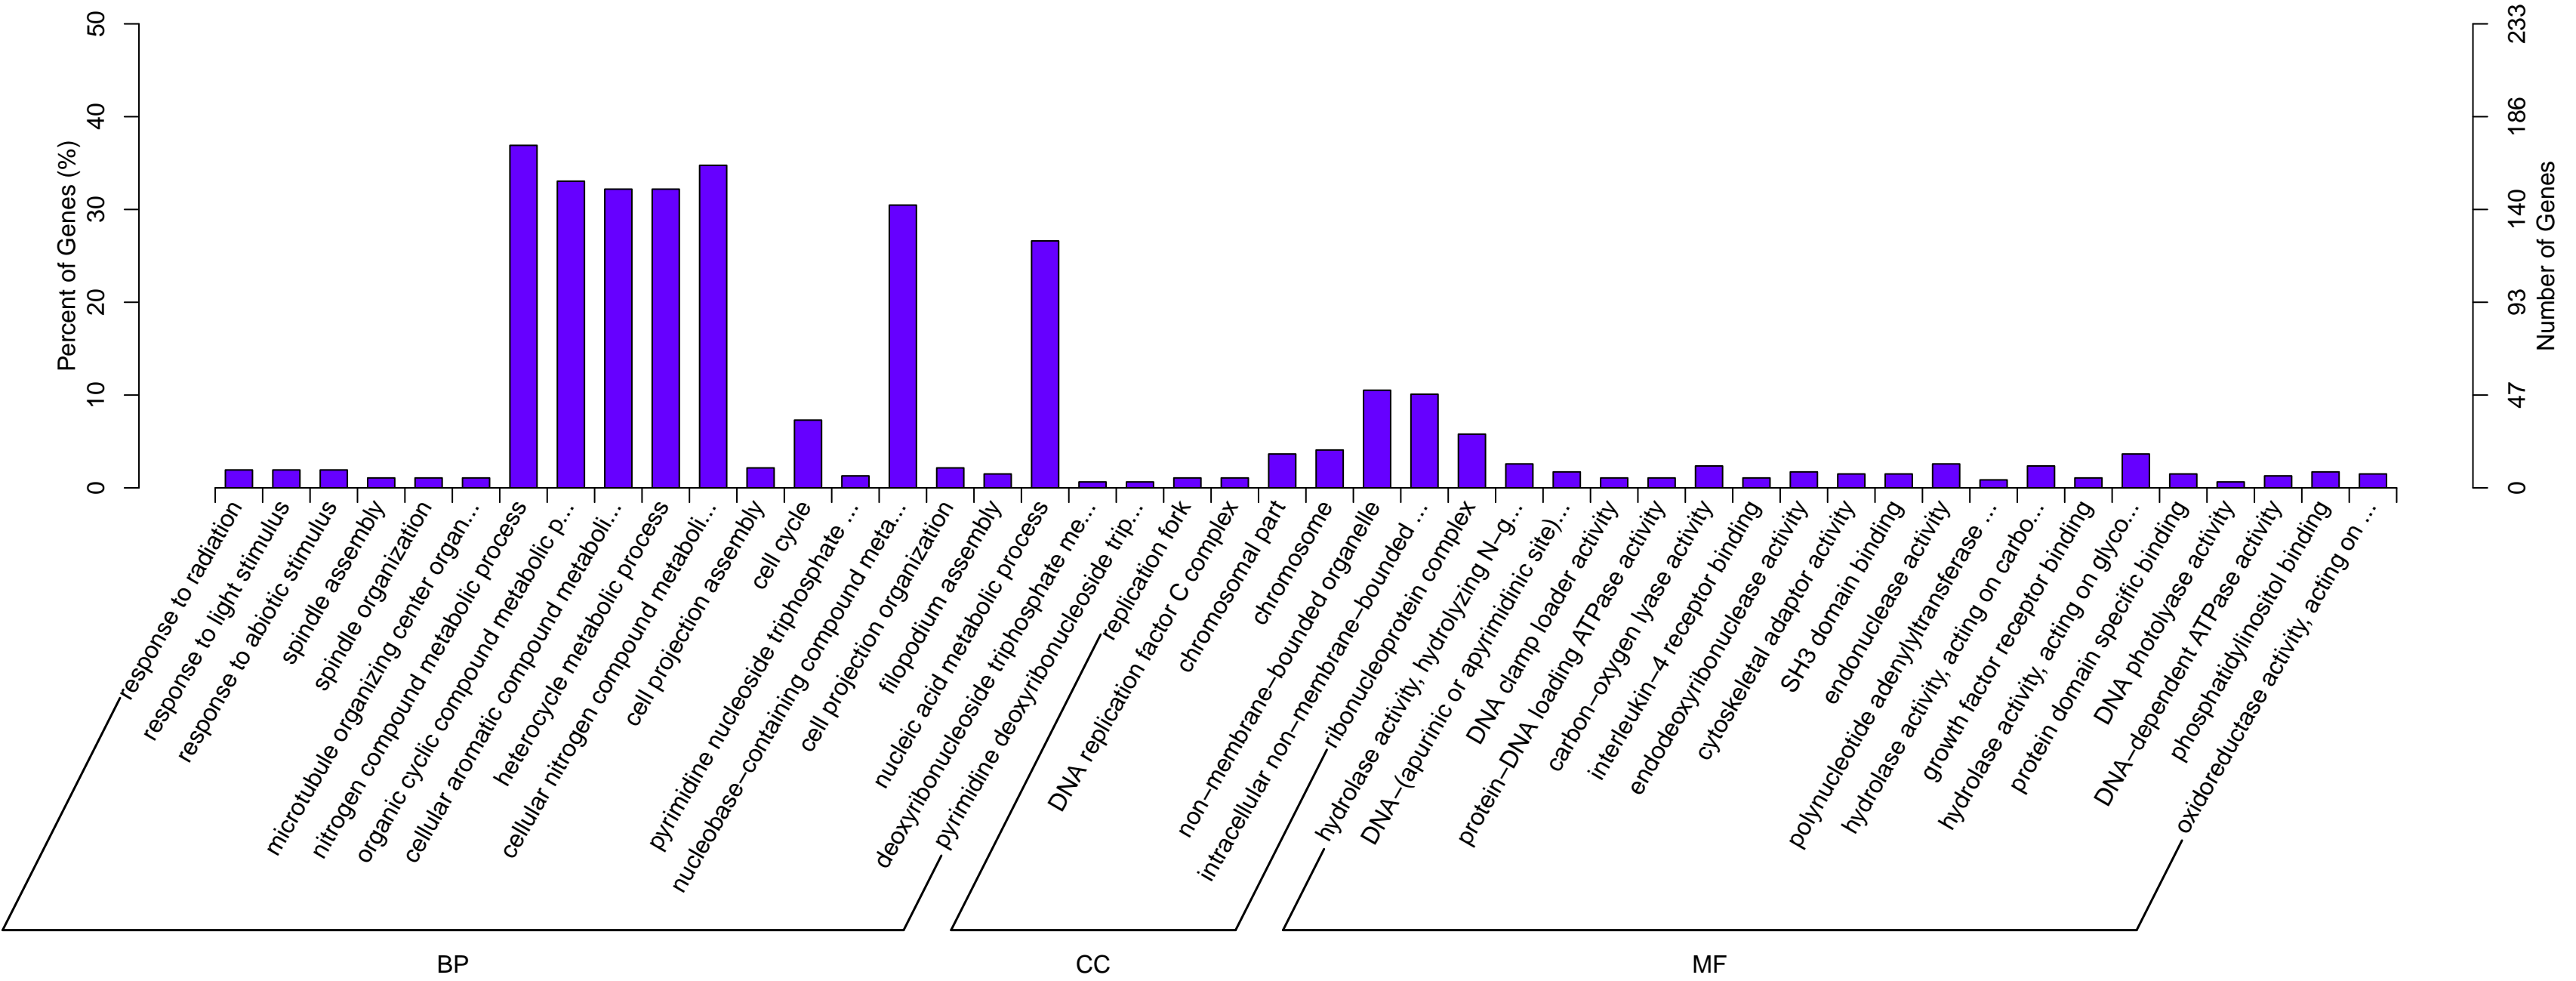

Supplement: Supplementary file 9 [file 17620031]
